# Supplementary material for: Climate‐induced range shifts shaped the present and threaten the future genetic variability of a marine brown alga in the Northwest Pacific
Source: PubMed Central journal article supplement (PMC8288013; doi:10.1111/eva.13247), 2021-05-18
Supplement: EVA-14-1867-s001.pdf [file EVA-14-1867-s001.pdf]

## Supplemental Information

### Climate-induced range shifts shaped the present and threaten the future genetic variability of a marine brown alga in the Northwest Pacific

#### Table of Contents:

|            |             |
|------------|-------------|
| Figure S1  | Page 2      |
| Figure S2  | Page 3      |
| Figure S3  | Page 4      |
| Figure S4  | Page 5      |
| Figure S5  | Page 6      |
| Figure S6  | Page 7      |
| Figure S7  | Page 8      |
| Figure S8  | Page 9      |
| Figure S9  | Page 10     |
| Figure S10 | Page 11     |
| Table S1   | Pages 12-13 |
| Table S2   | Pages 14    |
| Table S3   | Pages 15-16 |
| Table S4   | Pages 17-18 |
| Table S5   | Page 19     |
|            |             |
|            |             |
|            |             |

## Supplemental Figures

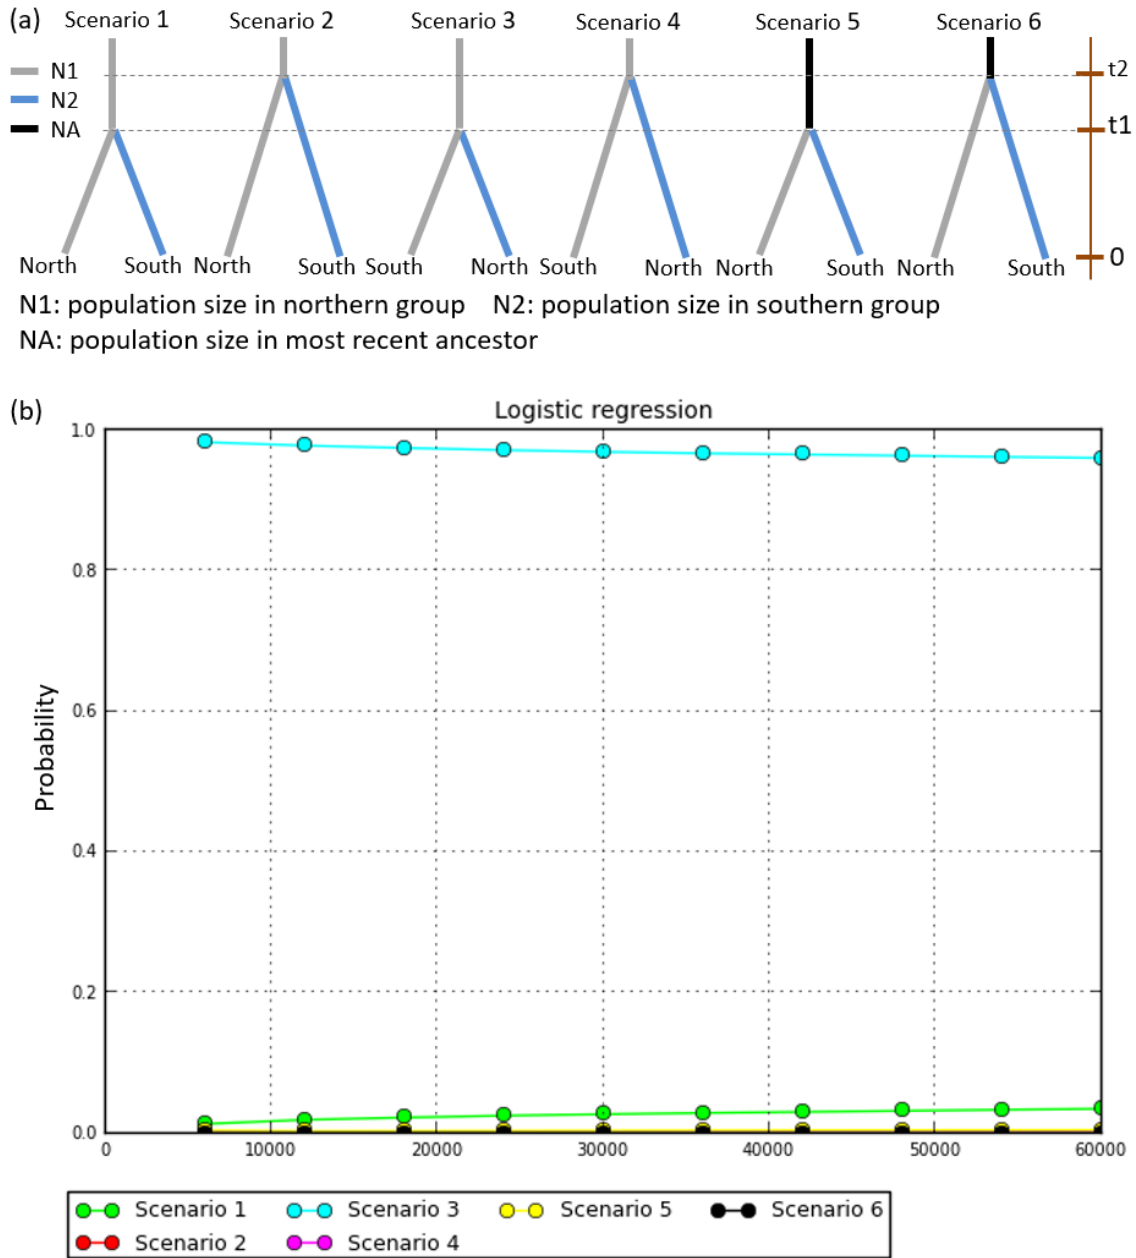

**Figure S1.** Schematic representation of scenarios compared in the first hierarchical levels of ABC analysis. The southern edge of the range (southern lineage) can be derived from stepping stone colonization of the northern lineage after the LGM (scenario 1) or before the LGM (scenario 2); the northern lineage can be derived from the stepping stone colonization of the southern edge of the range after the LGM (scenario 3) or before the LGM (scenario 4); the northern and southern lineages derived from an extinct most common ancestor and evolved separately after the LGM (scenario 5) or before the LGM (scenario 6). The logistic regression of the posterior probabilities of the three scenarios (b) was presented as a function of number of simulated datasets.

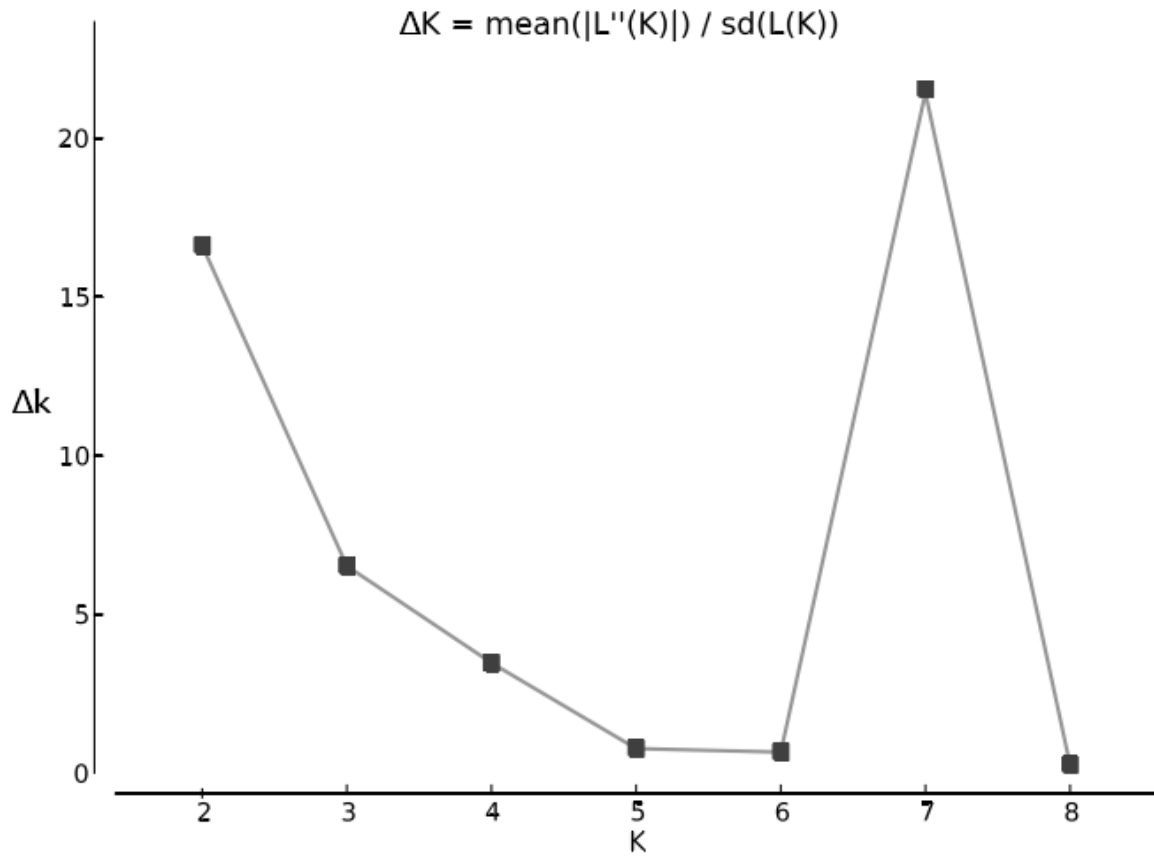

**Figure S2.** Plot of  $\Delta K$  calculated as the mean of the second-order rate of change in likelihood of  $K$  divided by the standard deviation of the likelihood of  $K$ .

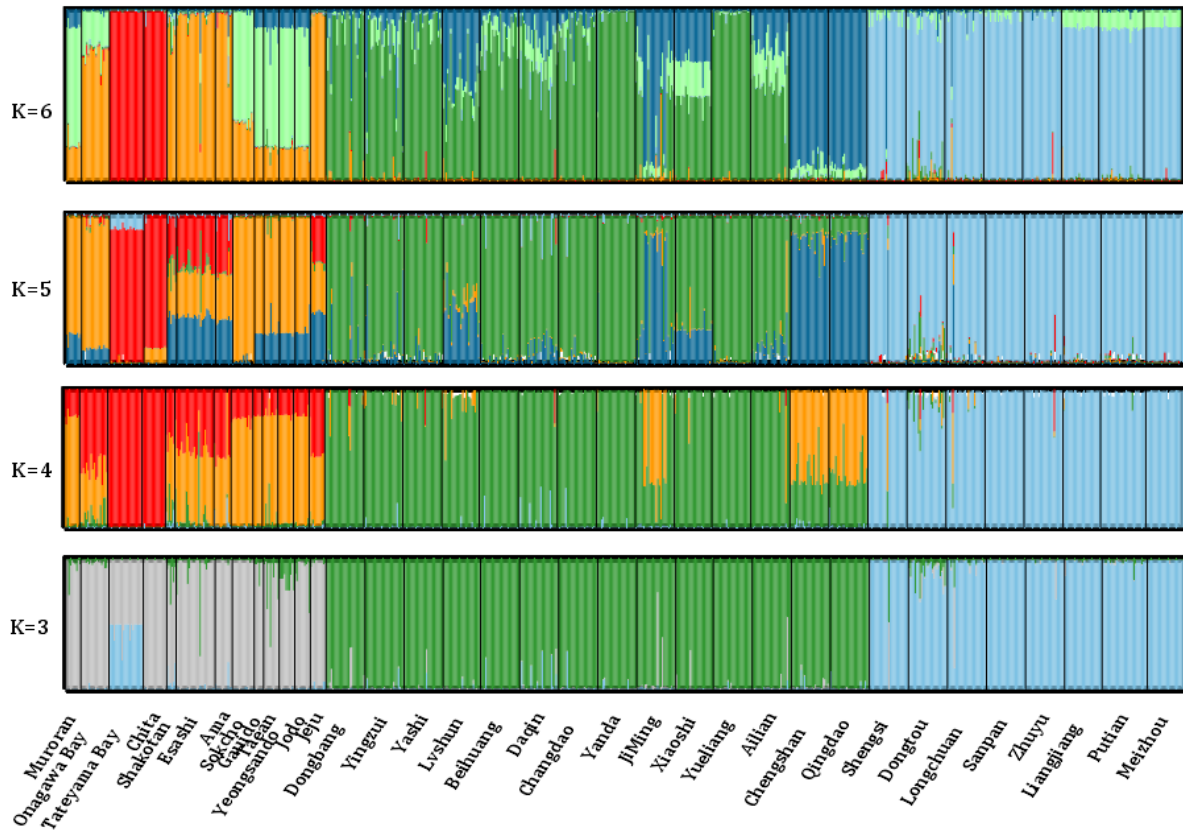

**Figure S3.** Genetic subdivision in *Sargassum thunbergii* based on Structure grouping (k=3-6). Colors are the same as depicted in Figure 1.

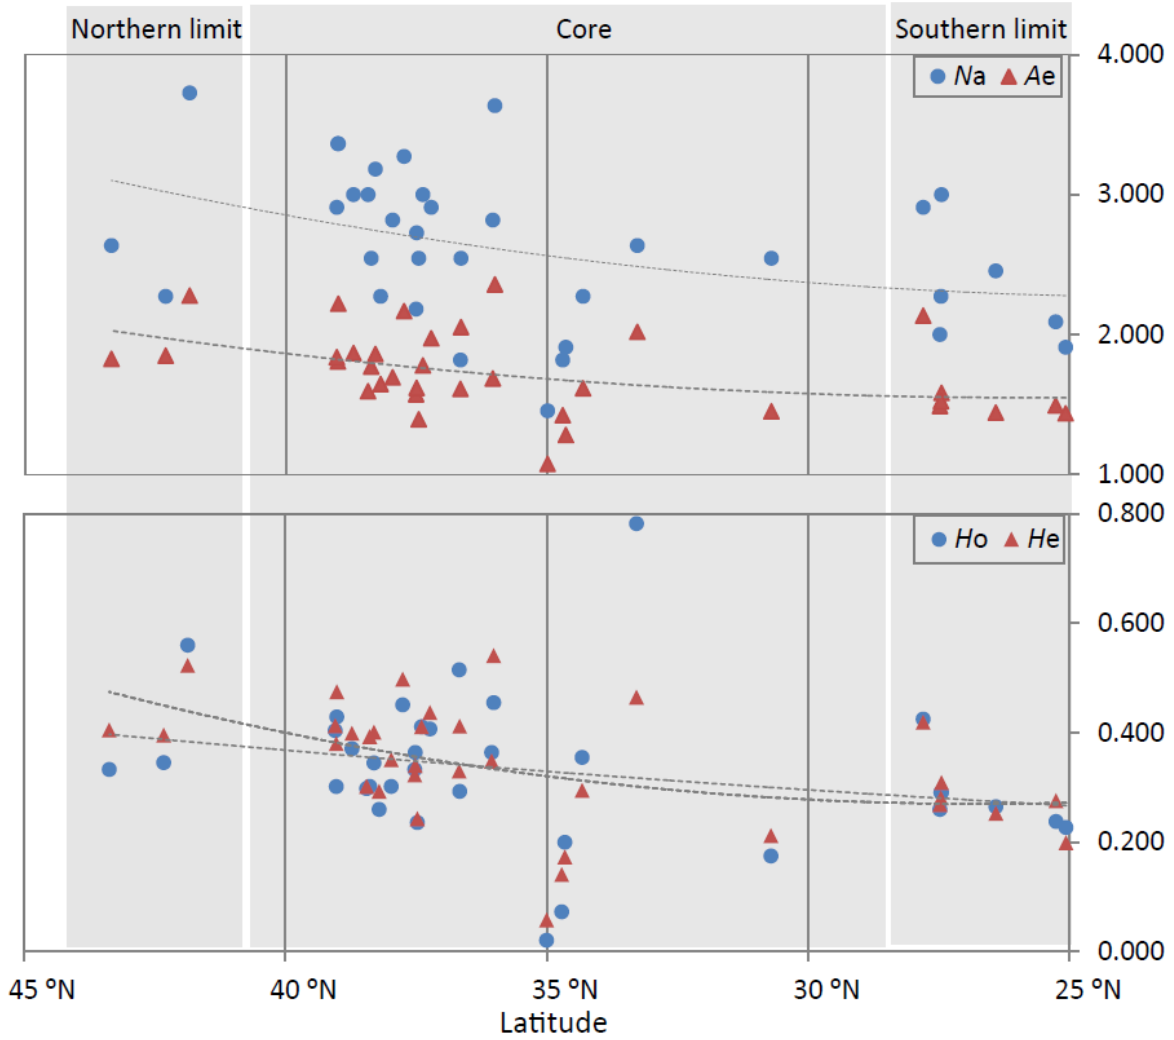

**Figure S4.** Latitudinal gradient genetic diversity measures ( $N_a$ ,  $A_e$ ,  $H_o$ ,  $H_e$ ) from the northern limit to the core and to the southern limit of the species' range.

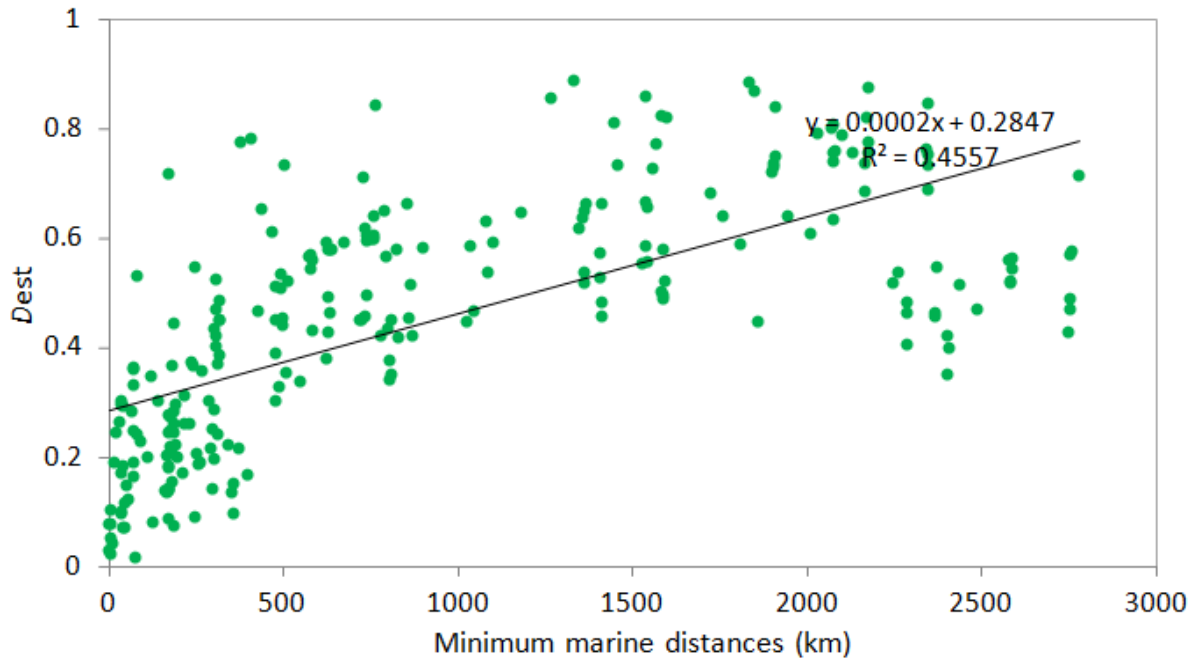

**Figure S5.** Estimates of pairwise differentiation ( $D_{est}$ ) in *Sargassum thunbergii* plotted against minimum marine distance for the range of the species. Isolation by distance was non-significant across the entire range.

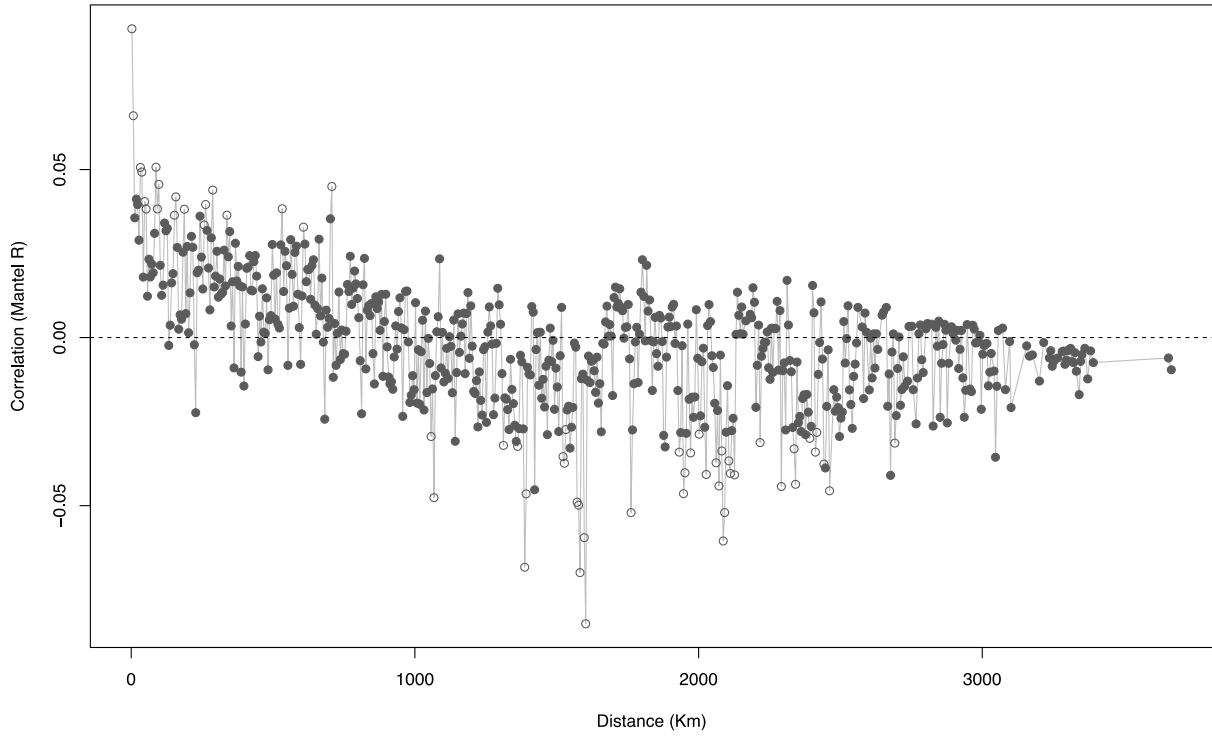

**Figure S6.** Spatial autocorrelation of environmental predictors (open circles depict significant spatial correlation).

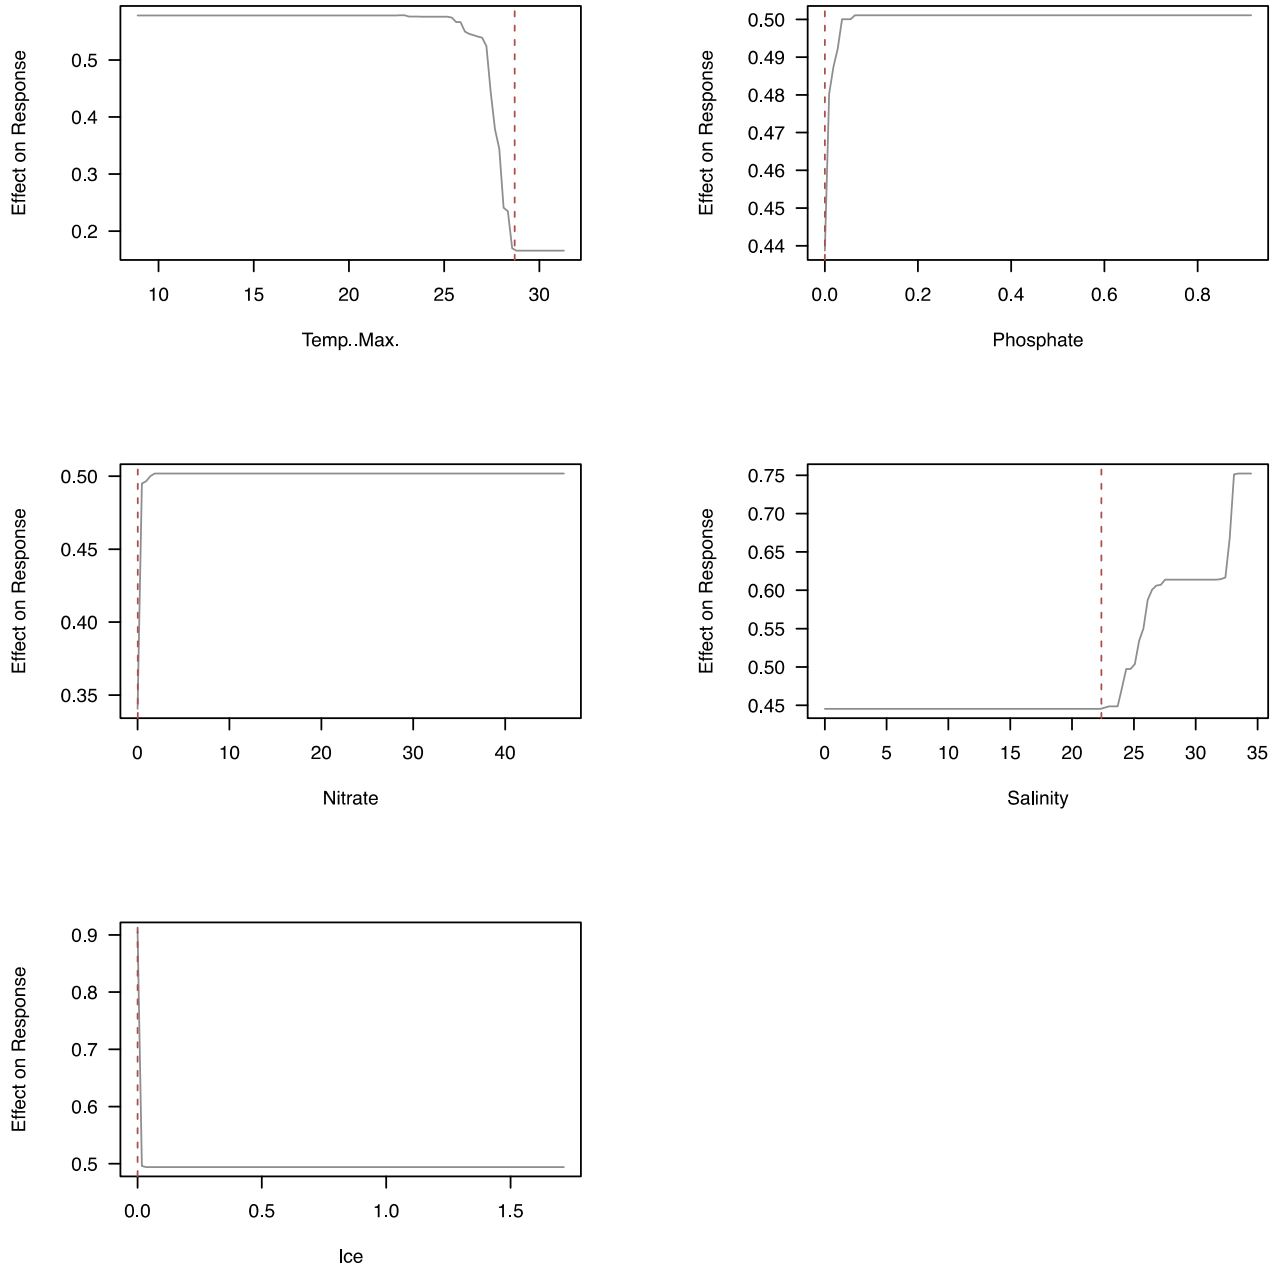

**Figure S7.** Partial dependency plots depicting the effect of each single predictor to the models developed for the northern genetic group.



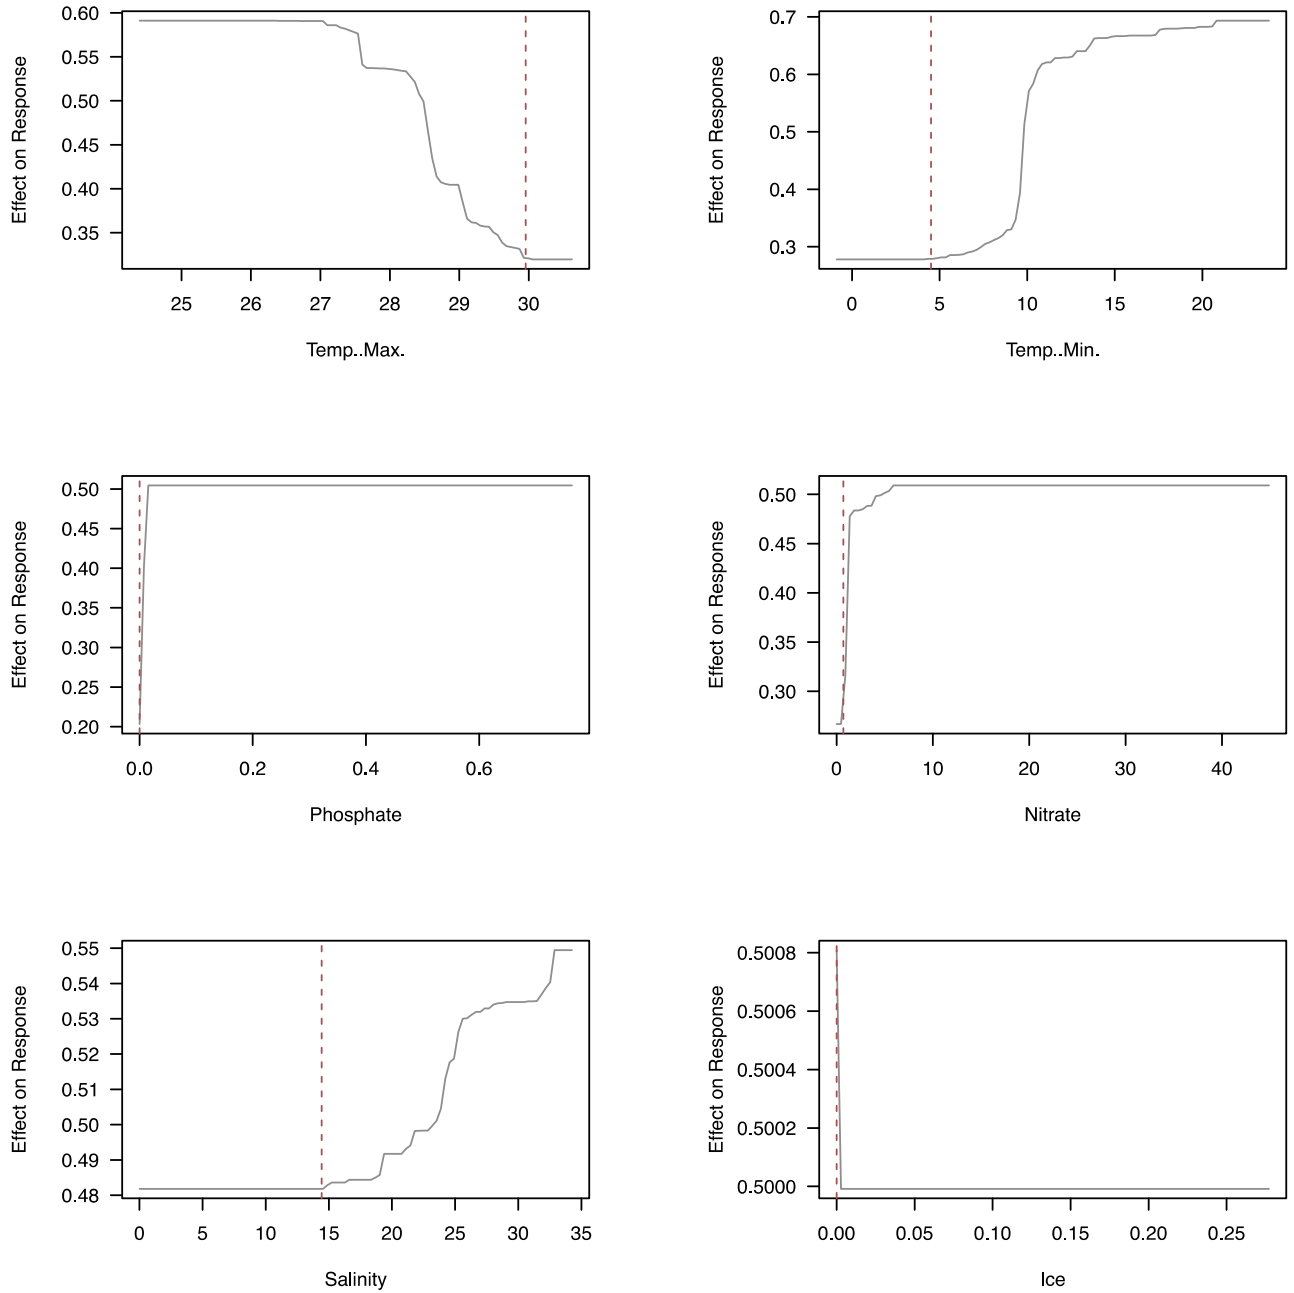

**Figure S8.** Partial dependency plots depicting the effect of each single predictor to the models developed for the southern genetic group.

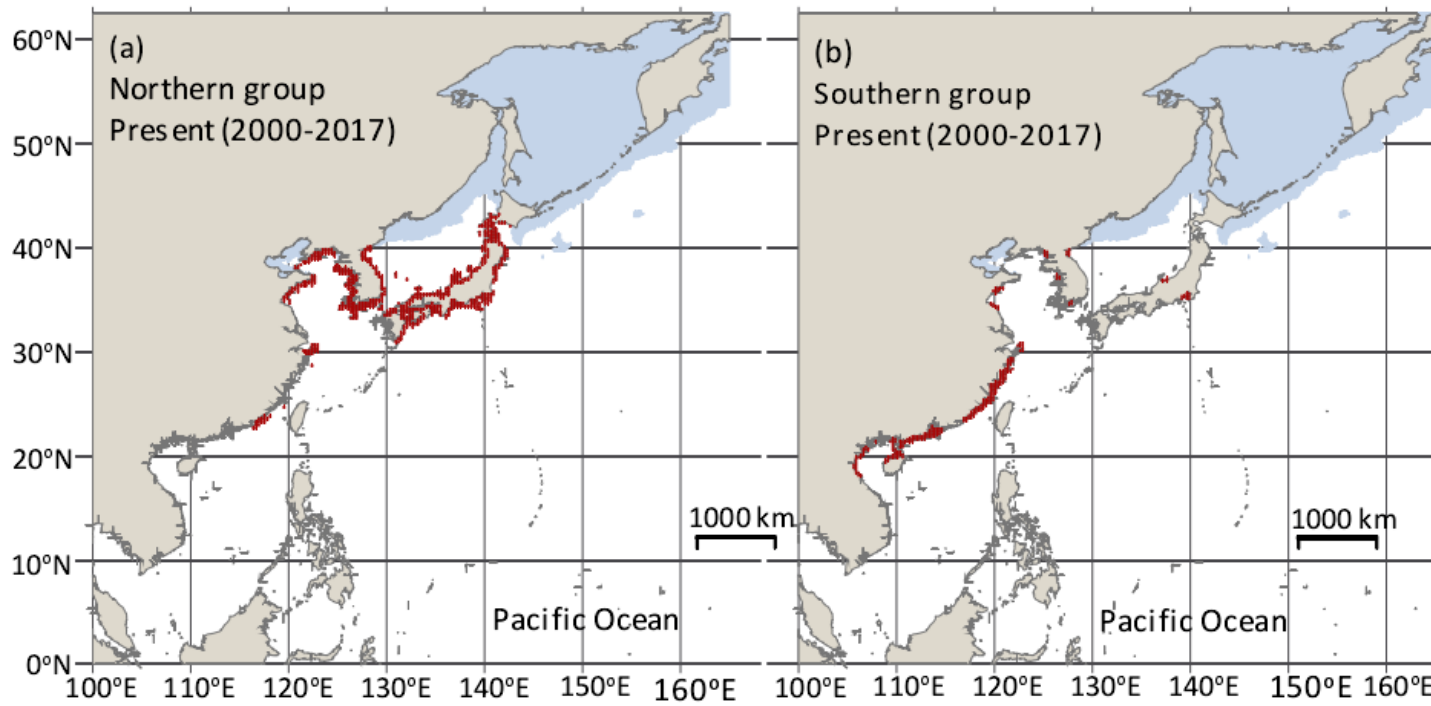

**Figure S9.** Potential distribution of the northern (a) and southern (b) genetic groups of *Sargassum thunbergii* predicted for the present. Light blue polygons depict seasonal sea ice and gray polygons depict land area.

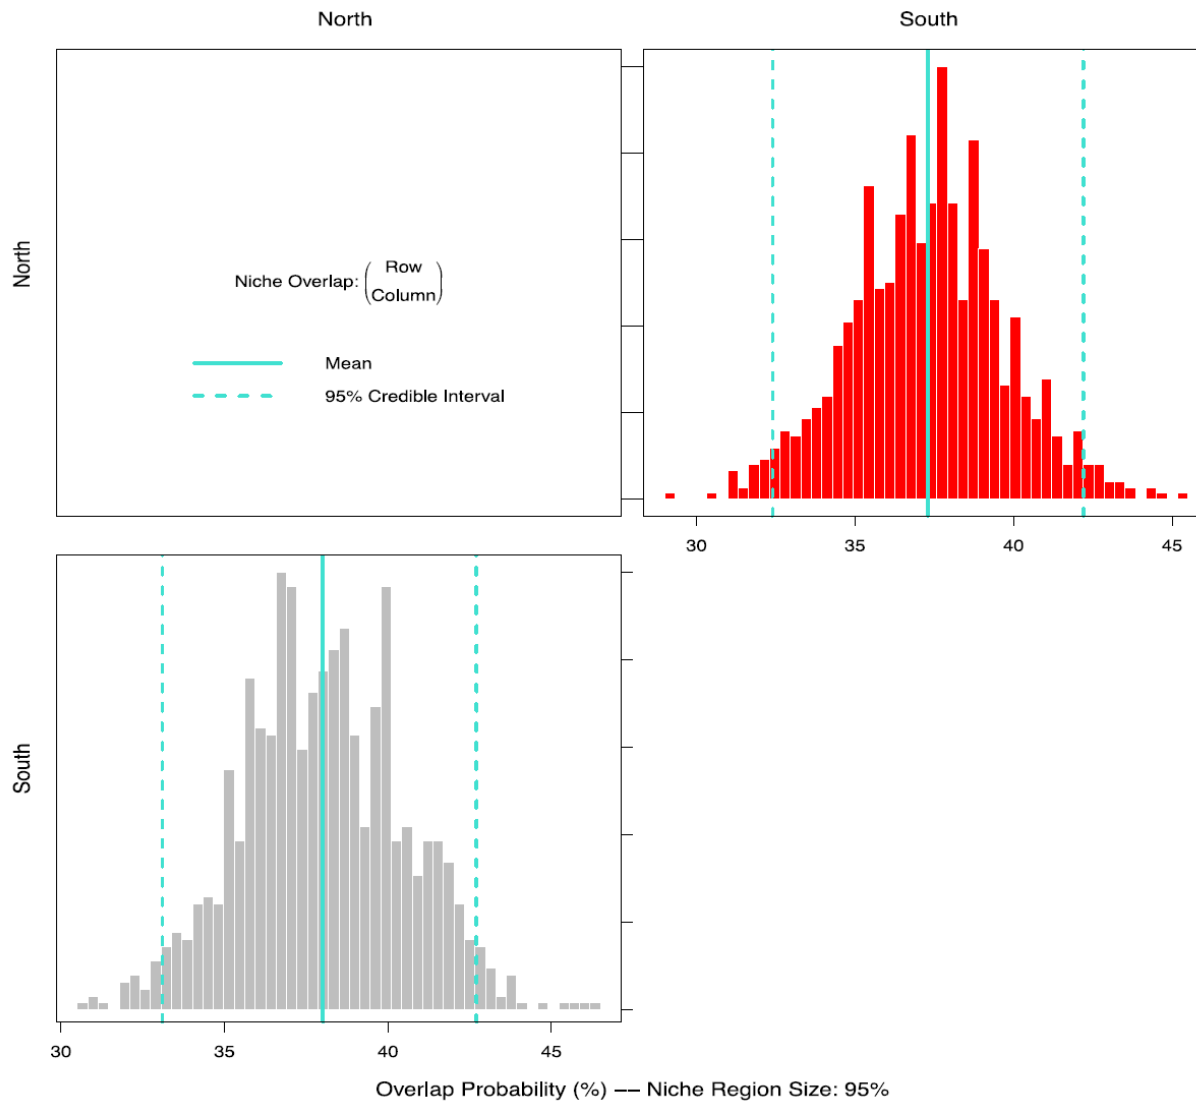

**Figure S10.** Probability (37.3%) of niche overlap between the northern and southern genetic groups of *S. thunbergii* and probability (38.1%) between the southern and the northern.

## Supplemental Tables

**Table S1.** Historical occurrence records of *Sargassum thunbergii* in China.

| Latitude | Longitude | Year of record | Full citation                                                                                                                                                                                          |
|----------|-----------|----------------|--------------------------------------------------------------------------------------------------------------------------------------------------------------------------------------------------------|
| 39.54°N  | 122.97°E  | 2009           | Yi et al. (2010) AFLP analysis of genetic diversity in six wild populations of <i>Sargassum thunbergii</i> . Journal of Fishery Sciences of China, 17:922-929 (In Chinese with English Abstract)       |
| 39.94°N  | 121.10°E  | 2008           | Yi et al. (2010) AFLP analysis of genetic diversity in six wild populations of <i>Sargassum thunbergii</i> . Journal of Fishery Sciences of China, 17:922-929 (In Chinese with English Abstract)       |
| 39.26°N  | 122.63°E  | 2008           | Yi et al. (2010) AFLP analysis of genetic diversity in six wild populations of <i>Sargassum thunbergii</i> . Journal of Fishery Sciences of China, 17:922-929 (In Chinese with English Abstract)       |
| 38.82°N  | 121.33°E  | 2008           | Yi et al. (2010) AFLP analysis of genetic diversity in six wild populations of <i>Sargassum thunbergii</i> . Journal of Fishery Sciences of China, 17:922-929 (In Chinese with English Abstract)       |
| 39.92°N  | 119.72°E  | 2014           | Li et al. (2014) Preliminary studies on the nitrogen and phosphorus absorption capability of seaweeds. Hebei Fisheries, 241:1-11 (In Chinese with English Abstract)                                    |
| 36.78°N  | 121.15°E  | 2008           | Wang et al. (2009) AFLP analysis in populations of <i>Sargassum thunbergii</i> along China coast. Biotechnology Bulletin, Suppl. 277-279 (In Chinese with English Abstract)                            |
| 35.35°N  | 119.42°E  | 1990           | Liu et al. (1995) Preliminary study on the benthic algae in the intertidal region of muguan island. Transactions of Oceanology and Limnology, 1:80-86 (In Chinese with English Abstract)               |
| 28.68°N  | 121.43°E  | 2011           | Quan et al. (2014) Growth and carbon sequestration rate of wild <i>Sargassum thunbergii</i> from different sources. Chinese Agricultural Science Bulletin, 30:79-82 (In Chinese with English Abstract) |
| 27.51°N  | 121.08°E  | 2011           | Quan et al. (2014) Growth and carbon sequestration rate of wild <i>Sargassum thunbergii</i> from different sources. Chinese Agricultural Science Bulletin, 30:79-82 (In Chinese with English Abstract) |

|         |          |      |                                                                                                                                                                                                                                                   |
|---------|----------|------|---------------------------------------------------------------------------------------------------------------------------------------------------------------------------------------------------------------------------------------------------|
| 24.40°N | 118.35°E | 1992 | Chen et al. (1994) Antibacterial and antifungal activity of ten red and brown algae from Fujian coast. Journal of Fujian Normal University (Natural Science), 10:75-79 (In Chinese with English Abstract)                                         |
| 25.30°N | 119.46°E | 1989 | Zheng Y and Chen ZH (1993) The seasonal growth and reproduction of <i>Sargassum thunbergii</i> (Phaeophyta) in Pingtan Island, Fujian province. Journal of Fujian Normal University (Natural Science), 9:81-85 (In Chinese with English Abstract) |
| 23.42°N | 117.25°E | 1986 | Yu et al. (1990) Studies on polysaccharides from algae. Journal of Shantou University (Natural Science). 5:55-60 (In Chinese with English Abstract)                                                                                               |
| 23.35°N | 117.13°E | 1984 | Zhang et al. (1990) A preliminary study on the ecology of the intertidal zone along the coast of southern Fujian province, China. Journal of Xiamen Fisheries College, 12:27-34 (In Chinese with English Abstract)                                |

**Table S2.** Prior distributions of parameters for each scenario and posterior parameter values for scenario 3. The unit of time is generation, and the generation time of *S. thunbergii* is about 1-2 years.

| Parameter                                    | Prior distribution                      | Posterior parameter estimation |                         |                                                  |
|----------------------------------------------|-----------------------------------------|--------------------------------|-------------------------|--------------------------------------------------|
|                                              |                                         | Median                         | Mode                    | 95% credible interval                            |
| N1: population size in northern group        | U(10, 10 <sup>5</sup> )                 | 12600                          | 5210                    | 2640-59300                                       |
| N2: population size in southern group        | U(10, 10 <sup>4</sup> )                 | 3700                           | 4060                    | 1330-6210                                        |
| NA: population size in most recent ancestor  | U(10, 10 <sup>6</sup> )                 | --                             | --                      | --                                               |
| t1: Time of divergence (post-LGM)            | U(10, 18000)                            | 4790                           | 3200                    | 1400-11200                                       |
| t2: Time of divergence (pre-LGM)             | U(21000, 10 <sup>5</sup> )              | --                             | --                      | --                                               |
| μ: mean mutation rate per generation for SSR | U(10 <sup>-4</sup> , 10 <sup>-3</sup> ) | 1.55 × 10 <sup>-4</sup>        | 1.00 × 10 <sup>-4</sup> | 1.02 × 10 <sup>-4</sup> -5.24 × 10 <sup>-4</sup> |

U, uniform distribution

**Table S3.** Pairwise  $F_{ST}$  differentiation between the 35 *Sargassum thunbergii* populations estimated using 11 microsatellite loci. Light blue and yellow colours represent  $F_{ST} \geq 0.5$  and  $0.25 \leq F_{ST} < 0.5$ , respectively.

|                                        | 1     | 2     | 3     | 4     | 5     | 6     | 7     | 8     | 9     | 10    | 11    | 12    | 13    | 14    | 15    | 16    | 17    | 18    |
|----------------------------------------|-------|-------|-------|-------|-------|-------|-------|-------|-------|-------|-------|-------|-------|-------|-------|-------|-------|-------|
| 1. Muroran, Hokkaido, Japan            | 0.000 |       |       |       |       |       |       |       |       |       |       |       |       |       |       |       |       |       |
| 2. Onagawa Bay, Miyagi, Japan          | 0.352 | 0.000 |       |       |       |       |       |       |       |       |       |       |       |       |       |       |       |       |
| 3. Tateyama Bay, Chiba, Japan          | 0.609 | 0.641 | 0.000 |       |       |       |       |       |       |       |       |       |       |       |       |       |       |       |
| 4. Chita, Aichi, Japan                 | 0.534 | 0.511 | 0.618 | 0.000 |       |       |       |       |       |       |       |       |       |       |       |       |       |       |
| 5. Shakotan, Hokkaido, Japan           | 0.300 | 0.379 | 0.547 | 0.458 | 0.000 |       |       |       |       |       |       |       |       |       |       |       |       |       |
| 6. Esashi, Hokkaido, Japan             | 0.243 | 0.316 | 0.486 | 0.415 | 0.093 | 0.000 |       |       |       |       |       |       |       |       |       |       |       |       |
| 7. Ama, Shimane, Japan                 | 0.267 | 0.250 | 0.428 | 0.366 | 0.185 | 0.123 | 0.000 |       |       |       |       |       |       |       |       |       |       |       |
| 8. Sokcho, Gangwondo, Korea            | 0.273 | 0.381 | 0.651 | 0.537 | 0.333 | 0.289 | 0.253 | 0.000 |       |       |       |       |       |       |       |       |       |       |
| 9. Gauido, Chungcheongnamdo, Korea     | 0.152 | 0.372 | 0.644 | 0.573 | 0.371 | 0.288 | 0.284 | 0.346 | 0.000 |       |       |       |       |       |       |       |       |       |
| 10. Taean, Chungcheongnamdo, Korea     | 0.128 | 0.323 | 0.591 | 0.504 | 0.282 | 0.225 | 0.237 | 0.298 | 0.159 | 0.000 |       |       |       |       |       |       |       |       |
| 11. Yeongsan, Jeollanamdo, Korea       | 0.233 | 0.496 | 0.759 | 0.704 | 0.460 | 0.372 | 0.378 | 0.485 | 0.131 | 0.246 | 0.000 |       |       |       |       |       |       |       |
| 12. Jodo, Jeollanamdo, Korea           | 0.193 | 0.431 | 0.667 | 0.606 | 0.335 | 0.292 | 0.315 | 0.359 | 0.220 | 0.180 | 0.253 | 0.000 |       |       |       |       |       |       |
| 13. Jeju Island, Jeju, Korea           | 0.316 | 0.268 | 0.534 | 0.428 | 0.200 | 0.158 | 0.180 | 0.324 | 0.372 | 0.285 | 0.462 | 0.371 | 0.000 |       |       |       |       |       |
| 14. Dongbang, Liaoning, China          | 0.273 | 0.351 | 0.590 | 0.547 | 0.256 | 0.223 | 0.229 | 0.399 | 0.291 | 0.251 | 0.334 | 0.278 | 0.300 | 0.000 |       |       |       |       |
| 15. Yingzuishi, Liaoning, China        | 0.234 | 0.310 | 0.517 | 0.461 | 0.196 | 0.172 | 0.188 | 0.355 | 0.252 | 0.196 | 0.324 | 0.271 | 0.235 | 0.058 | 0.000 |       |       |       |
| 16. Yazishi, Liaoning, China           | 0.291 | 0.325 | 0.542 | 0.499 | 0.233 | 0.218 | 0.195 | 0.355 | 0.310 | 0.250 | 0.363 | 0.299 | 0.278 | 0.063 | 0.068 | 0.000 |       |       |
| 17. Lvshun, Liaoning, China            | 0.213 | 0.287 | 0.563 | 0.521 | 0.292 | 0.236 | 0.226 | 0.346 | 0.231 | 0.191 | 0.283 | 0.250 | 0.298 | 0.113 | 0.119 | 0.135 | 0.000 |       |
| 18. Beihuangcheng Isl., Yantai, China  | 0.246 | 0.353 | 0.559 | 0.510 | 0.255 | 0.210 | 0.234 | 0.387 | 0.292 | 0.232 | 0.308 | 0.257 | 0.286 | 0.085 | 0.064 | 0.108 | 0.128 | 0.000 |
| 19. Daqin Island, Yantai, China        | 0.259 | 0.306 | 0.537 | 0.499 | 0.274 | 0.224 | 0.221 | 0.347 | 0.283 | 0.253 | 0.308 | 0.266 | 0.286 | 0.093 | 0.087 | 0.111 | 0.106 | 0.041 |
| 20. Changdao Island, Yantai, China     | 0.303 | 0.372 | 0.595 | 0.553 | 0.298 | 0.266 | 0.269 | 0.384 | 0.345 | 0.298 | 0.379 | 0.318 | 0.312 | 0.113 | 0.097 | 0.113 | 0.166 | 0.096 |
| 21. Yantai Univeristy, Yantai, China   | 0.361 | 0.397 | 0.705 | 0.615 | 0.354 | 0.300 | 0.282 | 0.477 | 0.391 | 0.354 | 0.488 | 0.383 | 0.348 | 0.150 | 0.154 | 0.153 | 0.247 | 0.182 |
| 22. Jiming Island, Weihai, China       | 0.198 | 0.299 | 0.503 | 0.445 | 0.165 | 0.143 | 0.182 | 0.288 | 0.224 | 0.202 | 0.293 | 0.266 | 0.193 | 0.149 | 0.107 | 0.145 | 0.138 | 0.138 |
| 23. Xiaoshi Island, Weihai, China      | 0.287 | 0.376 | 0.651 | 0.582 | 0.353 | 0.274 | 0.307 | 0.428 | 0.322 | 0.272 | 0.391 | 0.358 | 0.303 | 0.195 | 0.164 | 0.250 | 0.200 | 0.160 |
| 24. Yueliang Bay, Weihai, China        | 0.293 | 0.356 | 0.624 | 0.536 | 0.281 | 0.233 | 0.240 | 0.414 | 0.329 | 0.286 | 0.413 | 0.319 | 0.290 | 0.123 | 0.104 | 0.130 | 0.194 | 0.113 |
| 25. Ailian Bay, Weihai, China          | 0.245 | 0.310 | 0.535 | 0.476 | 0.272 | 0.207 | 0.222 | 0.322 | 0.272 | 0.234 | 0.319 | 0.337 | 0.260 | 0.160 | 0.110 | 0.131 | 0.166 | 0.098 |
| 26. Chengshantou, Weihai, China        | 0.215 | 0.338 | 0.528 | 0.487 | 0.260 | 0.219 | 0.244 | 0.372 | 0.247 | 0.211 | 0.296 | 0.263 | 0.269 | 0.188 | 0.119 | 0.181 | 0.125 | 0.124 |
| 27. Badaguan, Qingdao, China           | 0.306 | 0.426 | 0.592 | 0.550 | 0.262 | 0.230 | 0.282 | 0.437 | 0.341 | 0.274 | 0.396 | 0.269 | 0.304 | 0.192 | 0.137 | 0.212 | 0.198 | 0.145 |
| 28. Shengsi, Zhoushan, China           | 0.470 | 0.522 | 0.686 | 0.631 | 0.382 | 0.369 | 0.346 | 0.466 | 0.491 | 0.483 | 0.587 | 0.521 | 0.390 | 0.393 | 0.330 | 0.348 | 0.400 | 0.374 |
| 29. Dongtou, Wenzhou, China            | 0.329 | 0.365 | 0.520 | 0.487 | 0.235 | 0.229 | 0.204 | 0.334 | 0.330 | 0.326 | 0.405 | 0.370 | 0.278 | 0.200 | 0.172 | 0.174 | 0.233 | 0.230 |
| 30. Longchuanjiao, Wenzhou, China      | 0.393 | 0.447 | 0.584 | 0.529 | 0.307 | 0.300 | 0.268 | 0.433 | 0.395 | 0.388 | 0.486 | 0.421 | 0.355 | 0.292 | 0.231 | 0.253 | 0.306 | 0.271 |
| 31. Sanpanwei, Wenzhou, China          | 0.430 | 0.472 | 0.630 | 0.581 | 0.339 | 0.326 | 0.293 | 0.451 | 0.440 | 0.430 | 0.529 | 0.463 | 0.362 | 0.323 | 0.267 | 0.283 | 0.344 | 0.316 |
| 32. Zhuyu Island, Wenzhou, China       | 0.440 | 0.463 | 0.619 | 0.572 | 0.350 | 0.331 | 0.293 | 0.446 | 0.445 | 0.427 | 0.535 | 0.467 | 0.365 | 0.338 | 0.280 | 0.290 | 0.357 | 0.336 |
| 33. Huangqi, Liangjiang, Fuzhou, China | 0.448 | 0.495 | 0.656 | 0.597 | 0.343 | 0.343 | 0.308 | 0.457 | 0.473 | 0.444 | 0.560 | 0.474 | 0.351 | 0.362 | 0.302 | 0.313 | 0.389 | 0.341 |
| 34. Nanri Island, Putian, China        | 0.398 | 0.495 | 0.651 | 0.603 | 0.302 | 0.290 | 0.289 | 0.445 | 0.431 | 0.411 | 0.506 | 0.422 | 0.330 | 0.307 | 0.265 | 0.280 | 0.355 | 0.295 |
| 35. Meizhou Island, Putian, China      | 0.468 | 0.499 | 0.707 | 0.651 | 0.423 | 0.393 | 0.339 | 0.466 | 0.494 | 0.475 | 0.579 | 0.517 | 0.411 | 0.364 | 0.327 | 0.308 | 0.378 | 0.355 |

|                                         | 19    | 20    | 21    | 22    | 23    | 24    | 25    | 26    | 27    | 28    | 29    | 30    | 31    | 32    | 33    | 34    | 35    |
|-----------------------------------------|-------|-------|-------|-------|-------|-------|-------|-------|-------|-------|-------|-------|-------|-------|-------|-------|-------|
| 1. Muroran, Hokkaido, Japan             |       |       |       |       |       |       |       |       |       |       |       |       |       |       |       |       |       |
| 2. Onagawa Bay, Miyagi, Japan           |       |       |       |       |       |       |       |       |       |       |       |       |       |       |       |       |       |
| 3. Tateyama Bay, Chiba, Japan           |       |       |       |       |       |       |       |       |       |       |       |       |       |       |       |       |       |
| 4. Chita, Aichi, Japan                  |       |       |       |       |       |       |       |       |       |       |       |       |       |       |       |       |       |
| 5. Shakotan, Hokkaido, Japan            |       |       |       |       |       |       |       |       |       |       |       |       |       |       |       |       |       |
| 6. Esashi, Hokkaido, Japan              |       |       |       |       |       |       |       |       |       |       |       |       |       |       |       |       |       |
| 7. Ama, Shimane, Japan                  |       |       |       |       |       |       |       |       |       |       |       |       |       |       |       |       |       |
| 8. Sokcho, Gangwondo, Korea             |       |       |       |       |       |       |       |       |       |       |       |       |       |       |       |       |       |
| 9. Gaudio, Chungcheongnamdo, Korea      |       |       |       |       |       |       |       |       |       |       |       |       |       |       |       |       |       |
| 10. Taeon, Chungcheongnamdo, Korea      |       |       |       |       |       |       |       |       |       |       |       |       |       |       |       |       |       |
| 11. Yeongsan, Jeollanamdo, Korea        |       |       |       |       |       |       |       |       |       |       |       |       |       |       |       |       |       |
| 12. Jodo, Jeollanamdo, Korea            |       |       |       |       |       |       |       |       |       |       |       |       |       |       |       |       |       |
| 13. Jeju Island, Jeju, Korea            |       |       |       |       |       |       |       |       |       |       |       |       |       |       |       |       |       |
| 14. Dongbang, Liaoning, China           |       |       |       |       |       |       |       |       |       |       |       |       |       |       |       |       |       |
| 15. Yingzuishi, Liaoning, China         |       |       |       |       |       |       |       |       |       |       |       |       |       |       |       |       |       |
| 16. Yazishi, Liaoning, China            |       |       |       |       |       |       |       |       |       |       |       |       |       |       |       |       |       |
| 17. Lvshun, Liaoning, China             |       |       |       |       |       |       |       |       |       |       |       |       |       |       |       |       |       |
| 18. Beihuangcheng Island, Yantai, China |       |       |       |       |       |       |       |       |       |       |       |       |       |       |       |       |       |
| 19. Daqin Island, Yantai, China         | 0.000 |       |       |       |       |       |       |       |       |       |       |       |       |       |       |       |       |
| 20. Changdao Island, Yantai, China      | 0.082 | 0.000 |       |       |       |       |       |       |       |       |       |       |       |       |       |       |       |
| 21. Yantai Univeristy, Yantai, China    | 0.220 | 0.226 | 0.000 |       |       |       |       |       |       |       |       |       |       |       |       |       |       |
| 22. Jiming Island, Weihai, China        | 0.153 | 0.204 | 0.232 | 0.000 |       |       |       |       |       |       |       |       |       |       |       |       |       |
| 23. Xiaoshi Island, Weihai, China       | 0.158 | 0.229 | 0.318 | 0.157 | 0.000 |       |       |       |       |       |       |       |       |       |       |       |       |
| 24. Yueliang Bay, Weihai, China         | 0.162 | 0.178 | 0.025 | 0.169 | 0.237 | 0.000 |       |       |       |       |       |       |       |       |       |       |       |
| 25. Ailian Bay, Weihai, China           | 0.104 | 0.139 | 0.247 | 0.104 | 0.128 | 0.176 | 0.000 |       |       |       |       |       |       |       |       |       |       |
| 26. Chengshantou, Weihai, China         | 0.138 | 0.172 | 0.273 | 0.097 | 0.205 | 0.201 | 0.148 | 0.000 |       |       |       |       |       |       |       |       |       |
| 27. Badaguan, Qingdao, China            | 0.151 | 0.200 | 0.349 | 0.176 | 0.240 | 0.262 | 0.227 | 0.138 | 0.000 |       |       |       |       |       |       |       |       |
| 28. Shengsi, Zhoushan, China            | 0.342 | 0.350 | 0.508 | 0.279 | 0.452 | 0.440 | 0.322 | 0.355 | 0.428 | 0.000 |       |       |       |       |       |       |       |
| 29. Dongtou, Wenzhou, China             | 0.199 | 0.216 | 0.317 | 0.155 | 0.310 | 0.274 | 0.193 | 0.235 | 0.291 | 0.128 | 0.000 |       |       |       |       |       |       |
| 30. Longchuanjiao, Wenzhou, China       | 0.252 | 0.291 | 0.387 | 0.239 | 0.395 | 0.326 | 0.268 | 0.271 | 0.334 | 0.130 | 0.086 | 0.000 |       |       |       |       |       |
| 31. Sanpanwei, Wenzhou, China           | 0.287 | 0.304 | 0.432 | 0.262 | 0.425 | 0.376 | 0.298 | 0.314 | 0.381 | 0.074 | 0.070 | 0.042 | 0.000 |       |       |       |       |
| 32. Zhuyu Island, Wenzhou, China        | 0.301 | 0.309 | 0.449 | 0.286 | 0.436 | 0.394 | 0.302 | 0.329 | 0.391 | 0.124 | 0.068 | 0.063 | 0.034 | 0.000 |       |       |       |
| 33. Huangqi, Liangjiang, Fuzhou, China  | 0.329 | 0.348 | 0.449 | 0.277 | 0.448 | 0.388 | 0.329 | 0.353 | 0.411 | 0.148 | 0.149 | 0.158 | 0.115 | 0.164 | 0.000 |       |       |
| 34. Nanri Island, Putian, China         | 0.301 | 0.304 | 0.410 | 0.239 | 0.405 | 0.347 | 0.298 | 0.315 | 0.363 | 0.196 | 0.177 | 0.195 | 0.162 | 0.223 | 0.106 | 0.000 |       |
| 35. Meizhou Island, Putian, China       | 0.313 | 0.315 | 0.477 | 0.319 | 0.464 | 0.419 | 0.311 | 0.373 | 0.449 | 0.161 | 0.163 | 0.186 | 0.139 | 0.181 | 0.117 | 0.169 | 0.000 |



**Table S4.** Pairwise Jost' *D* differentiation between the 35 *Sargassum thunbergii* populations estimated using 11 microsatellite loci. Light blue and yellow colours represent  $F_{ST} \geq 0.75$  and  $0.5 \leq F_{ST} < 0.75$ , respectively.

|                                        | 1     | 2     | 3     | 4     | 5     | 6     | 7     | 8     | 9     | 10    | 11    | 12    | 13    | 14    | 15    | 16    | 17    | 18    |
|----------------------------------------|-------|-------|-------|-------|-------|-------|-------|-------|-------|-------|-------|-------|-------|-------|-------|-------|-------|-------|
| 1. Muroran, Hokkaido, Japan            | 0.000 |       |       |       |       |       |       |       |       |       |       |       |       |       |       |       |       |       |
| 2. Onagawa Bay, Miyagi, Japan          | 0.573 | 0.000 |       |       |       |       |       |       |       |       |       |       |       |       |       |       |       |       |
| 3. Tateyama Bay, Chiba, Japan          | 0.914 | 0.781 | 0.000 |       |       |       |       |       |       |       |       |       |       |       |       |       |       |       |
| 4. Chita, Aichi, Japan                 | 0.839 | 0.590 | 0.355 | 0.000 |       |       |       |       |       |       |       |       |       |       |       |       |       |       |
| 5. Shakotan, Hokkaido, Japan           | 0.545 | 0.656 | 0.722 | 0.625 | 0.000 |       |       |       |       |       |       |       |       |       |       |       |       |       |
| 6. Esashi, Hokkaido, Japan             | 0.531 | 0.642 | 0.774 | 0.702 | 0.134 | 0.000 |       |       |       |       |       |       |       |       |       |       |       |       |
| 7. Ama, Shimane, Japan                 | 0.623 | 0.470 | 0.632 | 0.587 | 0.358 | 0.288 | 0.000 |       |       |       |       |       |       |       |       |       |       |       |
| 8. Sokcho, Gangwondo, Korea            | 0.378 | 0.515 | 0.792 | 0.638 | 0.515 | 0.552 | 0.464 | 0.000 |       |       |       |       |       |       |       |       |       |       |
| 9. Gauido, Chungcheongnamdo, Korea     | 0.175 | 0.536 | 0.868 | 0.824 | 0.670 | 0.589 | 0.592 | 0.467 | 0.000 |       |       |       |       |       |       |       |       |       |
| 10. Taean, Chungcheongnamdo, Korea     | 0.160 | 0.518 | 0.885 | 0.773 | 0.512 | 0.492 | 0.537 | 0.445 | 0.189 | 0.000 |       |       |       |       |       |       |       |       |
| 11. Yeongsan, Jeollanamdo, Korea       | 0.224 | 0.608 | 0.820 | 0.887 | 0.681 | 0.625 | 0.663 | 0.565 | 0.088 | 0.250 | 0.000 |       |       |       |       |       |       |       |
| 12. Jodo, Jeollanamdo, Korea           | 0.230 | 0.639 | 0.857 | 0.856 | 0.522 | 0.561 | 0.647 | 0.455 | 0.240 | 0.215 | 0.195 | 0.000 |       |       |       |       |       |       |
| 13. Jeju Island, Jeju, Korea           | 0.689 | 0.446 | 0.809 | 0.647 | 0.357 | 0.351 | 0.420 | 0.577 | 0.776 | 0.611 | 0.801 | 0.716 | 0.000 |       |       |       |       |       |
| 14. Dongbang, Liaoning, China          | 0.462 | 0.554 | 0.804 | 0.850 | 0.419 | 0.463 | 0.490 | 0.667 | 0.437 | 0.421 | 0.373 | 0.380 | 0.618 | 0.000 |       |       |       |       |
| 15. Yingzuishi, Liaoning, China        | 0.455 | 0.565 | 0.776 | 0.760 | 0.350 | 0.403 | 0.454 | 0.678 | 0.436 | 0.367 | 0.450 | 0.453 | 0.533 | 0.076 | 0.000 |       |       |       |
| 16. Yazishi, Liaoning, China           | 0.545 | 0.530 | 0.726 | 0.761 | 0.396 | 0.482 | 0.422 | 0.595 | 0.518 | 0.452 | 0.464 | 0.458 | 0.594 | 0.075 | 0.100 | 0.000 |       |       |
| 17. Lvshun, Liaoning, China            | 0.339 | 0.427 | 0.761 | 0.801 | 0.535 | 0.519 | 0.501 | 0.552 | 0.327 | 0.301 | 0.305 | 0.341 | 0.638 | 0.149 | 0.195 | 0.201 | 0.000 |       |
| 18. Beihuangcheng Isl., Yantai, China  | 0.408 | 0.576 | 0.734 | 0.757 | 0.430 | 0.438 | 0.519 | 0.654 | 0.451 | 0.387 | 0.341 | 0.348 | 0.594 | 0.103 | 0.088 | 0.151 | 0.180 | 0.000 |
| 19. Daqin Island, Yantai, China        | 0.448 | 0.469 | 0.688 | 0.738 | 0.487 | 0.487 | 0.486 | 0.556 | 0.440 | 0.448 | 0.347 | 0.374 | 0.604 | 0.118 | 0.134 | 0.158 | 0.145 | 0.040 |
| 20. Changdao Island, Yantai, China     | 0.506 | 0.568 | 0.752 | 0.806 | 0.496 | 0.554 | 0.579 | 0.584 | 0.532 | 0.510 | 0.425 | 0.434 | 0.617 | 0.135 | 0.137 | 0.145 | 0.228 | 0.112 |
| 21. Yantai Univeristy, Yantai, China   | 0.521 | 0.489 | 0.846 | 0.756 | 0.510 | 0.525 | 0.493 | 0.664 | 0.506 | 0.523 | 0.496 | 0.450 | 0.579 | 0.150 | 0.194 | 0.168 | 0.302 | 0.199 |
| 22. Jiming Island, Weihai, China       | 0.378 | 0.562 | 0.776 | 0.750 | 0.287 | 0.332 | 0.457 | 0.518 | 0.386 | 0.401 | 0.407 | 0.463 | 0.429 | 0.261 | 0.211 | 0.269 | 0.246 | 0.242 |
| 23. Xiaoshi Island, Weihai, China      | 0.439 | 0.543 | 0.876 | 0.839 | 0.611 | 0.546 | 0.663 | 0.662 | 0.449 | 0.420 | 0.416 | 0.490 | 0.559 | 0.253 | 0.249 | 0.380 | 0.274 | 0.202 |
| 24. Yueliang Bay, Weihai, China        | 0.470 | 0.517 | 0.821 | 0.730 | 0.445 | 0.453 | 0.483 | 0.649 | 0.484 | 0.470 | 0.479 | 0.426 | 0.542 | 0.147 | 0.148 | 0.170 | 0.272 | 0.136 |
| 25. Ailian Bay, Weihai, China          | 0.446 | 0.520 | 0.755 | 0.736 | 0.522 | 0.473 | 0.527 | 0.538 | 0.449 | 0.432 | 0.401 | 0.579 | 0.569 | 0.251 | 0.192 | 0.209 | 0.275 | 0.140 |
| 26. Chengshantou, Weihai, China        | 0.353 | 0.559 | 0.683 | 0.721 | 0.461 | 0.482 | 0.572 | 0.636 | 0.369 | 0.354 | 0.337 | 0.377 | 0.564 | 0.293 | 0.200 | 0.300 | 0.182 | 0.178 |
| 27. Badaguan, Qingdao, China           | 0.511 | 0.712 | 0.735 | 0.787 | 0.406 | 0.454 | 0.615 | 0.726 | 0.520 | 0.449 | 0.455 | 0.337 | 0.590 | 0.262 | 0.209 | 0.322 | 0.286 | 0.188 |
| 28. Shengsi, Zhoushan, China           | 0.770 | 0.755 | 0.680 | 0.733 | 0.539 | 0.678 | 0.631 | 0.585 | 0.711 | 0.844 | 0.675 | 0.734 | 0.651 | 0.539 | 0.510 | 0.481 | 0.582 | 0.514 |
| 29. Dongtou, Wenzhou, China            | 0.666 | 0.644 | 0.676 | 0.736 | 0.405 | 0.520 | 0.454 | 0.547 | 0.578 | 0.677 | 0.566 | 0.645 | 0.603 | 0.323 | 0.323 | 0.289 | 0.412 | 0.398 |
| 30. Longchuanjiao, Wenzhou, China      | 0.699 | 0.710 | 0.629 | 0.650 | 0.473 | 0.607 | 0.527 | 0.653 | 0.605 | 0.707 | 0.596 | 0.624 | 0.690 | 0.427 | 0.378 | 0.376 | 0.476 | 0.394 |
| 31. Sanpanwei, Wenzhou, China          | 0.744 | 0.713 | 0.663 | 0.713 | 0.506 | 0.631 | 0.551 | 0.636 | 0.664 | 0.775 | 0.634 | 0.671 | 0.654 | 0.451 | 0.423 | 0.403 | 0.520 | 0.450 |
| 32. Zhuyu Island, Wenzhou, China       | 0.798 | 0.708 | 0.662 | 0.712 | 0.548 | 0.662 | 0.568 | 0.645 | 0.698 | 0.787 | 0.672 | 0.705 | 0.678 | 0.499 | 0.466 | 0.427 | 0.568 | 0.508 |
| 33. Huangqi, Liangjiang, Fuzhou, China | 0.776 | 0.751 | 0.701 | 0.726 | 0.496 | 0.659 | 0.577 | 0.629 | 0.734 | 0.791 | 0.686 | 0.678 | 0.601 | 0.522 | 0.489 | 0.449 | 0.612 | 0.490 |
| 34. Nanri Island, Putian, China        | 0.662 | 0.795 | 0.747 | 0.801 | 0.427 | 0.537 | 0.548 | 0.633 | 0.651 | 0.726 | 0.589 | 0.577 | 0.575 | 0.426 | 0.426 | 0.403 | 0.556 | 0.415 |
| 35. Meizhou Island, Putian, China      | 0.741 | 0.662 | 0.708 | 0.763 | 0.625 | 0.729 | 0.594 | 0.564 | 0.697 | 0.793 | 0.625 | 0.699 | 0.691 | 0.461 | 0.489 | 0.387 | 0.513 | 0.458 |

|                                         | 19    | 20    | 21    | 22    | 23    | 24    | 25    | 26    | 27    | 28    | 29    | 30    | 31    | 32    | 33    | 34    | 35    |
|-----------------------------------------|-------|-------|-------|-------|-------|-------|-------|-------|-------|-------|-------|-------|-------|-------|-------|-------|-------|
| 1. Muroran, Hokkaido, Japan             |       |       |       |       |       |       |       |       |       |       |       |       |       |       |       |       |       |
| 2. Onagawa Bay, Miyagi, Japan           |       |       |       |       |       |       |       |       |       |       |       |       |       |       |       |       |       |
| 3. Tateyama Bay, Chiba, Japan           |       |       |       |       |       |       |       |       |       |       |       |       |       |       |       |       |       |
| 4. Chita, Aichi, Japan                  |       |       |       |       |       |       |       |       |       |       |       |       |       |       |       |       |       |
| 5. Shakotan, Hokkaido, Japan            |       |       |       |       |       |       |       |       |       |       |       |       |       |       |       |       |       |
| 6. Esashi, Hokkaido, Japan              |       |       |       |       |       |       |       |       |       |       |       |       |       |       |       |       |       |
| 7. Ama, Shimane, Japan                  |       |       |       |       |       |       |       |       |       |       |       |       |       |       |       |       |       |
| 8. Sokcho, Gangwondo, Korea             |       |       |       |       |       |       |       |       |       |       |       |       |       |       |       |       |       |
| 9. Gaudio, Chungcheongnamdo, Korea      |       |       |       |       |       |       |       |       |       |       |       |       |       |       |       |       |       |
| 10. Taean, Chungcheongnamdo, Korea      |       |       |       |       |       |       |       |       |       |       |       |       |       |       |       |       |       |
| 11. Yeongsan, Jeollanamdo, Korea        |       |       |       |       |       |       |       |       |       |       |       |       |       |       |       |       |       |
| 12. Jodo, Jeollanamdo, Korea            |       |       |       |       |       |       |       |       |       |       |       |       |       |       |       |       |       |
| 13. Jeju Island, Jeju, Korea            |       |       |       |       |       |       |       |       |       |       |       |       |       |       |       |       |       |
| 14. Dongbang, Liaoning, China           |       |       |       |       |       |       |       |       |       |       |       |       |       |       |       |       |       |
| 15. Yingzuishi, Liaoning, China         |       |       |       |       |       |       |       |       |       |       |       |       |       |       |       |       |       |
| 16. Yazishi, Liaoning, China            |       |       |       |       |       |       |       |       |       |       |       |       |       |       |       |       |       |
| 17. Lvshun, Liaoning, China             |       |       |       |       |       |       |       |       |       |       |       |       |       |       |       |       |       |
| 18. Beihuangcheng Island, Yantai, China |       |       |       |       |       |       |       |       |       |       |       |       |       |       |       |       |       |
| 19. Daqin Island, Yantai, China         | 0.000 |       |       |       |       |       |       |       |       |       |       |       |       |       |       |       |       |
| 20. Changdao Island, Yantai, China      | 0.094 | 0.000 |       |       |       |       |       |       |       |       |       |       |       |       |       |       |       |
| 21. Yantai Univeristy, Yantai, China    | 0.260 | 0.239 | 0.000 |       |       |       |       |       |       |       |       |       |       |       |       |       |       |
| 22. Jiming Island, Weihai, China        | 0.281 | 0.366 | 0.346 | 0.000 |       |       |       |       |       |       |       |       |       |       |       |       |       |
| 23. Xiaoshi Island, Weihai, China       | 0.203 | 0.293 | 0.363 | 0.247 | 0.000 |       |       |       |       |       |       |       |       |       |       |       |       |
| 24. Yueliang Bay, Weihai, China         | 0.218 | 0.219 | 0.013 | 0.283 | 0.301 | 0.000 |       |       |       |       |       |       |       |       |       |       |       |
| 25. Ailian Bay, Weihai, China           | 0.154 | 0.198 | 0.330 | 0.187 | 0.169 | 0.261 | 0.000 |       |       |       |       |       |       |       |       |       |       |
| 26. Chengshantou, Weihai, China         | 0.206 | 0.244 | 0.359 | 0.163 | 0.290 | 0.294 | 0.243 | 0.000 |       |       |       |       |       |       |       |       |       |
| 27. Badaguan, Qingdao, China            | 0.203 | 0.259 | 0.444 | 0.302 | 0.311 | 0.366 | 0.371 | 0.185 | 0.000 |       |       |       |       |       |       |       |       |
| 28. Shengsi, Zhoushan, China            | 0.453 | 0.417 | 0.605 | 0.419 | 0.599 | 0.596 | 0.449 | 0.493 | 0.578 | 0.000 |       |       |       |       |       |       |       |
| 29. Dongtou, Wenzhou, China             | 0.335 | 0.336 | 0.454 | 0.298 | 0.524 | 0.455 | 0.348 | 0.428 | 0.505 | 0.127 | 0.000 |       |       |       |       |       |       |
| 30. Longchuanjiao, Wenzhou, China       | 0.364 | 0.397 | 0.476 | 0.416 | 0.598 | 0.459 | 0.429 | 0.411 | 0.486 | 0.098 | 0.097 | 0.000 |       |       |       |       |       |
| 31. Sanpanwei, Wenzhou, China           | 0.399 | 0.385 | 0.520 | 0.433 | 0.617 | 0.523 | 0.457 | 0.466 | 0.545 | 0.044 | 0.069 | 0.027 | 0.000 |       |       |       |       |
| 32. Zhuyu Island, Wenzhou, China        | 0.439 | 0.407 | 0.574 | 0.504 | 0.667 | 0.583 | 0.478 | 0.514 | 0.584 | 0.086 | 0.068 | 0.048 | 0.019 | 0.000 |       |       |       |
| 33. Huangqi, Liangjiang, Fuzhou, China  | 0.471 | 0.456 | 0.534 | 0.454 | 0.654 | 0.532 | 0.512 | 0.538 | 0.597 | 0.099 | 0.168 | 0.140 | 0.085 | 0.137 | 0.000 |       |       |
| 34. Nanri Island, Putian, China         | 0.435 | 0.392 | 0.482 | 0.387 | 0.579 | 0.468 | 0.464 | 0.475 | 0.511 | 0.151 | 0.220 | 0.194 | 0.138 | 0.215 | 0.078 | 0.000 |       |
| 35. Meizhou Island, Putian, China       | 0.385 | 0.343 | 0.515 | 0.494 | 0.608 | 0.529 | 0.414 | 0.517 | 0.609 | 0.094 | 0.167 | 0.150 | 0.093 | 0.134 | 0.072 | 0.121 | 0.000 |

**Table S5.** Variable contribution (%) and physiological tolerance limits inferred with Boosted Regression Trees considering within-taxon niche structure into two main genetic groups of *S. thunbergii* in the Northwest Pacific.

|                  | North        |                              | South        |                              |
|------------------|--------------|------------------------------|--------------|------------------------------|
|                  | Contribution | Tolerance limit              | Contribution | Tolerance limit              |
| Min. ocean temp. | 0            | -                            | <b>32.30</b> | 4.39 °C                      |
| Max. ocean temp. | <b>26.17</b> | 28.75 °C                     | <b>31.88</b> | 29.93 °C                     |
| Ice thickness    | <b>72.53</b> | 0.02 m                       | 0            | -                            |
| Salinity         | 0.87         | 22.01                        | 4.174        | 14.45                        |
| Nitrates         | 0.08         | 0.320 mmol . m <sup>-3</sup> | <b>14.48</b> | 0.553 mmol . m <sup>-3</sup> |
| Phosphates       | 0.35         | 0.017 mmol . m <sup>-3</sup> | <b>17.14</b> | 0.015 mmol . m <sup>-3</sup> |
